# Supplementary material for: Pre-incarceration police harassment, drug addiction and HIV risk behaviours among prisoners in Kyrgyzstan and Azerbaijan: results from a nationally representative cross-sectional study
Source: PubMed Central journal article supplement (PMC4951538; doi:10.7448/ias.19.4.20880), 2016-07-18
Supplement: JIAS-19-20880-s001.pdf [file JIAS-19-20880-s001.pdf]

## Technical Supplement

### Preamble

We encourage the curious readers to consult the growing selection of books, book chapters, and seminal articles to get more exposure and familiarize themselves with the framework of structural equation modeling (SEM). SEM is a diverse class of statistical methods and analytic techniques, which include factor analysis, path analysis, and latent growth and process modeling, and is often used to estimate latent (i.e., unobserved) constructs and the nature of the relationship among them. It is important to mention from the start that our paper reports the results of path analysis, a special case of SEM, where the focus is on relationships of multiple observed or directly measured, and not latent, variables. Path models provide researchers with a more complete theoretical testing, specification, and understanding relative to traditional regression analyses. Path models allow one to examine direct, indirect, and total effects simultaneously in one model, as well as to apply some of the bootstrap resampling techniques in SEM programs, which also are able to appropriately correct for missing data problems and non-normality in the data. Essentially, however, performing multi-group path analysis is similar to running multiple regressions with interaction terms simultaneously; therefore, the results presented in the manuscript are likely to hold with less sophisticated and more common techniques.

This supplement provides more detail on our multi-group path analysis that was performed in AMOS.22. To calculate indirect effects and investigate potential mediating relationships among the variables in the model, we used the AMOS bootstrapping procedure with a bias-corrected accelerated confidence intervals,<sup>1</sup> a recommended analytic strategy for avoiding measurement error and underestimation of the mediation significance.<sup>2</sup>

Specifically, to explore the relative effects of detention on HIV risk-taking, and investigate potential mediating relationships among the variables identified as significant correlates through bivariate testing while also accounting for moderating impact of each country, we performed a multi-group path analysis with official and unofficial detention as exogenous variables, addiction severity as a mediator, and composite HIV risk as an endogenous variable. We controlled for depression, anxiety, social support, and the presence of alcohol use disorders, and estimated indirect effects via bootstrapping procedures, while step-wise eliminating insignificant paths and “hanging” variables.

As noted in the manuscript, our data is cross-sectional; nevertheless, we believe it is important to clarify the temporal ordering in the questionnaire. Detention history measures asked about experiences in the year before the current incarceration; while drug addiction and HIV risk behaviors were assessed by a set of items addressing behaviors in the 30-day period prior to the arrest that resulted in the current incarceration. Being able to measure the current within prison drug injection (WPDI) for the Kyrgyzstan sample has allowed us to further clarify and confirm temporal ordering in our cross-sectional data. Thus, the relationships between detention, addiction severity, and HIV-risk are correlational, although they follow the temporal ordering of the survey.

## Measures of Model Fit

The chi-square value  $\chi^2$  (with degrees of freedom and a corresponding p value) can be used to assess whether a specified model fits the data; however, this statistic should be used with caution, as it is sensitive to sample size, and is likely to result in statistical significance with a large sample size, rejecting the null that the model fits the data.<sup>3</sup>

Comparative fit index (CFI)<sup>4</sup> is a commonly used index that involves comparing the fit of a specified *default* model against the fit of the null *independence* model that assumes no relationships among the variables.

Root Mean Square Error of Approximation (RMSEA) is a widely used index of model fit that looks at the differences between observed and predicted covariances and corrects for model complexity. A value of the RMSEA of about .05 or less typically indicates a good fit of the model in relation to the degrees of freedom, but a value of .08 or less are also adequate. The RMSEA is reported with the 90% confidence interval: LO 90 and HI 90.

PCLOSE is a p value that tests the null hypothesis that the RMSEA is no greater than .05, and if p is greater than .05, the model fit is close.

The goodness of fit index (GFI) ranges from 0 to 1, where 1 indicates a perfect fit. It is important to note that this measure is strongly affected by sample size and is reported here conventionally, as it has not lost its popularity despite the documented bias (see Kline<sup>5</sup>). AGFI is adjusted GFI for the degrees of freedom, bounded by 1 above but is not bounded below by zero.

## Path Diagrams

SEM is a graphical modeling methodology, so the graphical representation is essential to defining and formalizing the specification of a model. As can be seen in the path diagram below (Model 1), rectangles represent observed variables, which are the measurement constructs described under the study measures section of the manuscript. These variables are exogenous (predictors) and endogenous (criterion).

As shown in the path diagram, small circles (labeled *e*) are error terms or disturbances, which are latent influences on the constructs and reflect both variance attributable to random processes as well as the processes specific to that construct, and are usually attached to all endogenous variables in the model.<sup>6</sup>

**Model 1.** Base aggregate model with covariates for two countries combined without bootstrap procedure.  
*Note:* variable description “Drugs” refers to addiction severity and “HIVoutcome” refers to HIV risk throughout.

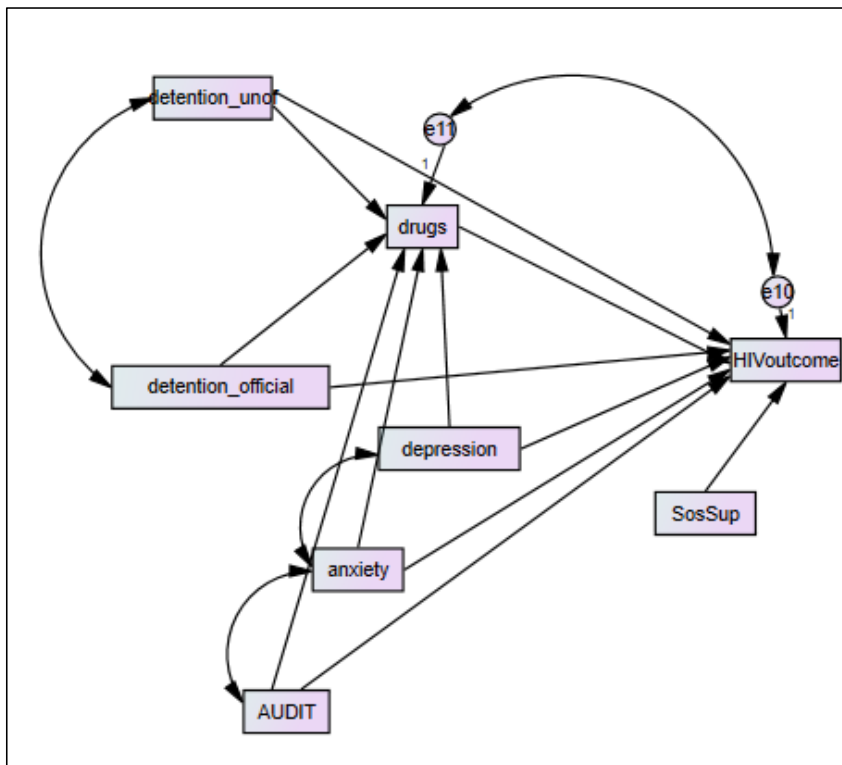

**RESULTS**

Results are produced by the AMOS text output

\*\*\*  $p < .05$

**Regression Weights:**

| Predictor            | Criterion | B       | Beta  | S.E.   | C.R.   | P    |
|----------------------|-----------|---------|-------|--------|--------|------|
| Detention unofficial | Drugs     | .005    | .142  | .001   | 4.221  | ***  |
| Anxiety              | Drugs     | .000    | .104  | .000   | 2.510  | .012 |
| Detention official   | Drugs     | .002    | .052  | .001   | 1.556  | .120 |
| Depression           | Drugs     | .000    | .012  | .001   | .289   | .772 |
| AUDIT                | Drugs     | .001    | .160  | .000   | 4.800  | ***  |
| Social support       | Drugs     | .001    | .027  | .002   | .824   | .410 |
| Drugs                | HIV risk  | 200.967 | .553  | 10.237 | 19.632 | ***  |
| Social support       | HIV risk  | 3.413   | .195  | .479   | 7.126  | ***  |
| Detention official   | HIV risk  | -.931   | -.059 | .442   | -2.106 | .035 |
| Detention unofficial | HIV risk  | .629    | .045  | .391   | 1.609  | .108 |
| Depression           | HIV risk  | -.403   | -.091 | .151   | -2.660 | .008 |
| Anxiety              | HIV risk  | .092    | .054  | .058   | 1.587  | .113 |
| AUDIT                | HIV risk  | -.014   | -.006 | .066   | -.212  | .832 |

**Covariances and Correlations:**

| Variables                                    | Estimate | S.E.  | C.R.   | P   | Correlation |
|----------------------------------------------|----------|-------|--------|-----|-------------|
| Detention unofficial <--> Detention official | .328     | .059  | 5.587  | *** | .194        |
| Anxiety <--> AUDIT                           | -8.873   | 2.577 | -3.442 | *** | -.095       |
| Anxiety <--> Depression                      | 29.503   | 1.959 | 15.061 | *** | .595        |

**Variances:**

| Variables            | Estimate | S.E.   | C.R.   | P   |
|----------------------|----------|--------|--------|-----|
| Detention unofficial | 1.930    | .093   | 20.748 | *** |
| Social Support       | 1.212    | .058   | 20.748 | *** |
| Anxiety              | 130.060  | 6.248  | 20.815 | *** |
| Detention official   | 1.480    | .071   | 20.748 | *** |
| Depression           | 18.882   | .910   | 20.748 | *** |
| AUDIT                | 67.187   | 3.238  | 20.748 | *** |
| e11                  | .003     | .000   | 20.748 | *** |
| e10                  | 239.187  | 11.528 | 20.748 | *** |

**Squared Multiple Correlations (endogenous variables only):**

| Variables | Estimate |
|-----------|----------|
| Drugs     | .061     |
| HIV risk  | .359     |

**Model 2.** Base aggregate model (trimmed based on Model 1 results) with covariates for two countries combined with standardized coefficients and measures of fit, and without bootstrap procedure.

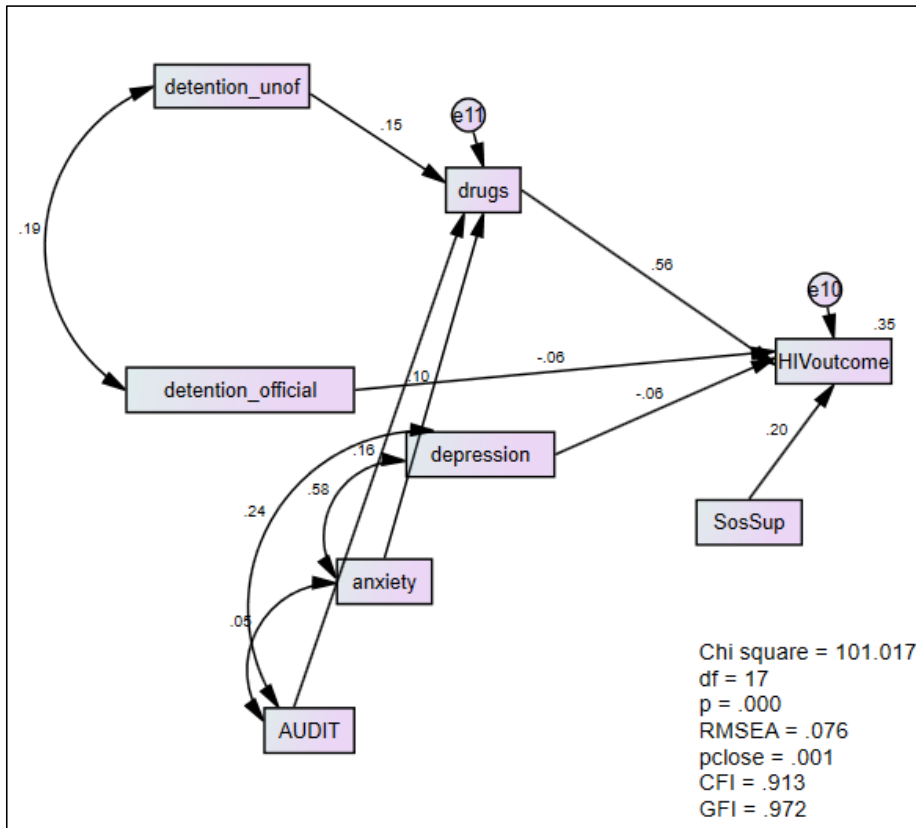

**Notes for Model (Default model)**

Number of distinct sample moments: 36  
 Number of distinct parameters to be estimated: 19  
 Degrees of freedom (36 - 19): 17

Chi-square = 101.017  
 Degrees of freedom = 17  
 Probability level = .000

**RESULTS**

**Regression Weights:**

| Predictor            | Criterion | B       | Beta  | S.E.  | C.R.   | P    |
|----------------------|-----------|---------|-------|-------|--------|------|
| Detention unofficial | Drugs     | .006    | .152  | .001  | 4.601  | ***  |
| Anxiety              | Drugs     | .000    | .102  | .000  | 3.090  | .002 |
| AUDIT                | Drugs     | .001    | .161  | .000  | 4.882  | ***  |
| Drugs                | HIV risk  | 204.208 | .563  | 9.980 | 20.463 | ***  |
| Social support       | HIV risk  | 3.429   | .196  | .480  | 7.142  | ***  |
| Detention official   | HIV risk  | -.876   | -.055 | .435  | -2.014 | .044 |
| Depression           | HIV risk  | -.250   | -.056 | .122  | -2.049 | .040 |

**Covariances and Correlations:**

| Variables                                    | Estimate | S.E.  | C.R.   | P    | Correlation |
|----------------------------------------------|----------|-------|--------|------|-------------|
| Detention unofficial <--> Detention official | .328     | .059  | 5.587  | ***  | .194        |
| Anxiety <--> AUDIT                           | 4.225    | 3.146 | 1.343  | .179 | .046        |
| Anxiety <--> Depression                      | 28.396   | 1.927 | 14.737 | ***  | .581        |
| AUDIT <--> Depression                        | 8.383    | 1.247 | 6.722  | ***  | .235        |

**Variances:**

| Variables            | Estimate | S.E.   | C.R.   | P   |
|----------------------|----------|--------|--------|-----|
| Detention unofficial | 1.930    | .093   | 20.748 | *** |
| Social support       | 1.212    | .058   | 20.748 | *** |
| Anxiety              | 126.601  | 6.102  | 20.748 | *** |
| AUDIT                | 67.187   | 3.238  | 20.748 | *** |
| Detention official   | 1.480    | .071   | 20.748 | *** |
| Depression           | 18.882   | .910   | 20.748 | *** |
| e11                  | .003     | .000   | 20.748 | *** |
| e10                  | 240.542  | 11.593 | 20.748 | *** |

**Squared Multiple Correlations:**

| Variables | Estimate |
|-----------|----------|
| Drugs     | .061     |
| HIV risk  | .354     |

**Model Fit Summary**

| Model              | GFI  | AGFI | CFI  | RMSEA | LO 90 | HI 90 | PCLOSE |
|--------------------|------|------|------|-------|-------|-------|--------|
| Default model      | .972 | .940 | .913 | .076  | .062  | .090  | .001   |
| Independence model | .795 | .736 | .000 | .200  | .189  | .211  | .000   |

**Model 3.** Base aggregate model (trimmed based on Model 2 results) with covariates for two countries combined, with standardized coefficients, measures of fit, and without bootstrap procedure.

*Note:* This model is subsequently used for multi-group procedure (Model 4).

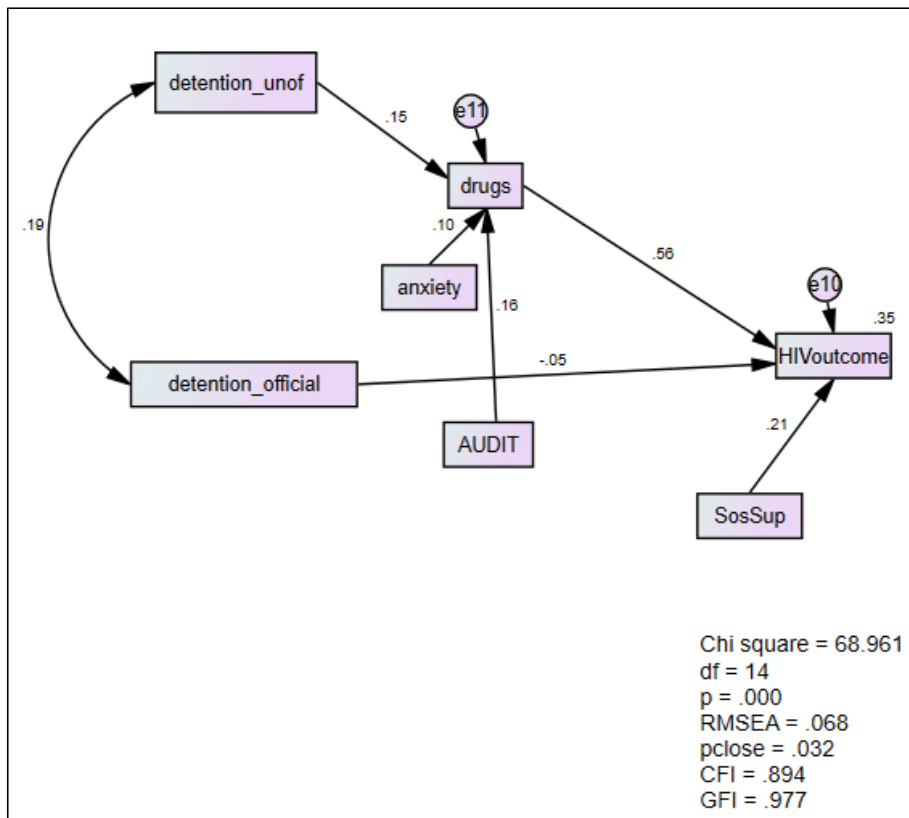

**Notes for Model**

Number of distinct sample moments: 28  
 Number of distinct parameters to be estimated: 14  
 Degrees of freedom (28 - 14): 14

Minimum was achieved  
 Chi-square = 68.961  
 Degrees of freedom = 14  
 Probability level = .000

## RESULTS

### Regression Weights:

| Predictor            | Criterion | B       | Beta  | S.E.  | C.R.   | P    |
|----------------------|-----------|---------|-------|-------|--------|------|
| Detention unofficial | Drugs     | .006    | .152  | .001  | 4.601  | ***  |
| Anxiety              | Drugs     | .000    | .102  | .000  | 3.093  | .002 |
| AUDIT                | Drugs     | .001    | .161  | .000  | 4.887  | ***  |
| Drugs                | HIV risk  | 201.713 | .556  | 9.963 | 20.246 | ***  |
| Social Support       | HIV risk  | 3.599   | .205  | .481  | 7.477  | ***  |
| Detention official   | HIV risk  | -.856   | -.051 | .436  | -1.964 | .051 |

### Covariances and Correlations:

| Variables                                    | Estimate | S.E. | C.R.  | P   | Correlation |
|----------------------------------------------|----------|------|-------|-----|-------------|
| Detention unofficial <--> Detention official | .328     | .059 | 5.587 | *** | .194        |

### Variances:

| Variables            | Estimate | S.E.   | C.R.   | P   |
|----------------------|----------|--------|--------|-----|
| Detention unofficial | 1.930    | .093   | 20.748 | *** |
| Social Support       | 1.212    | .058   | 20.748 | *** |
| Anxiety              | 126.601  | 6.102  | 20.748 | *** |
| Detention official   | 1.480    | .071   | 20.748 | *** |
| AUDIT                | 67.187   | 3.238  | 20.748 | *** |
| e11                  | .003     | .000   | 20.748 | *** |
| e10                  | 241.673  | 11.648 | 20.748 | *** |

### Squared Multiple Correlations:

| Variables | Estimate |
|-----------|----------|
| Drugs     | .060     |
| HIV risk  | .352     |

### Model Fit Summary

| Model              | GFI  | AGFI | CFI  | RMSEA | LO 90 | HI 90 | PCLOSE |
|--------------------|------|------|------|-------|-------|-------|--------|
| Default model      | .977 | .955 | .894 | .068  | .052  | .084  | .032   |
| Independence model | .858 | .810 | .000 | .170  | .157  | .182  | .000   |



Model 4 (see the diagram below) is a final Multi-group model with bootstrap and covariates.

*Note:* Both, Official detention and AUDIT were trimmed from the multi-group indirect effects estimation model because they were no longer significant (once the country was included as a moderator), as shown in the table below for Kyrgyzstan:

**Regression Weights: (KYRGYZSTAN)**

| Predictor            | Criterion | B      | Beta | S.E.   | C.R.   | P    |
|----------------------|-----------|--------|------|--------|--------|------|
| Detention unofficial | Drugs     | .005   | .159 | .002   | 3.101  | .002 |
| Anxiety              | Drugs     | .001   | .132 | .000   | 2.576  | .010 |
| AUDIT                | Drugs     | .001   | .077 | .000   | 1.502  | .133 |
| Drugs                | HIV risk  | 205.05 | .651 | 12.486 | 16.423 | ***  |
| Social support       | HIV risk  | 1.766  | .078 | .901   | 1.960  | .050 |

**Model 4a.** Multi-group final model with bootstrap, covariates, and measures of fit for Kyrgyzstan:

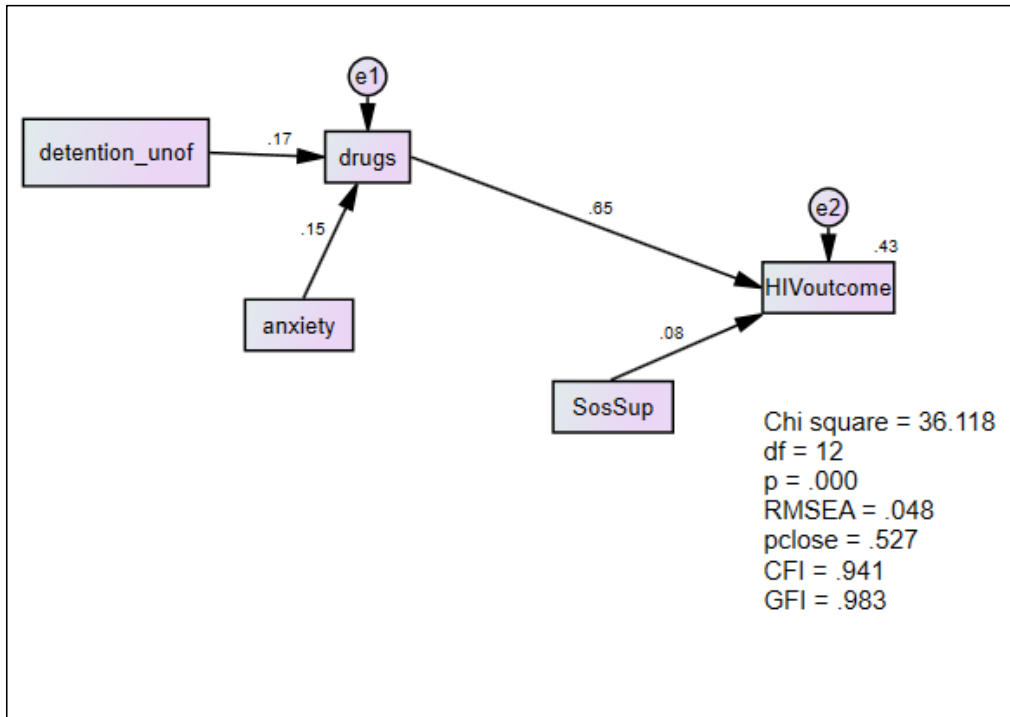

**Notes for Model**

Number of distinct sample moments: 30  
Number of distinct parameters to be estimated: 18  
Degrees of freedom (30 - 18): 12

Minimum was achieved  
Chi-square = 36.118  
Degrees of freedom = 12  
Probability level = .000

**Model Fit Summary**

| Model              | GFI  | AGFI | CFI  | RMSEA | LO 90 | HI 90 | PCLOSE |
|--------------------|------|------|------|-------|-------|-------|--------|
| Default model      | .983 | .958 | .941 | .048  | .031  | .067  | .527   |
| Independence model | .850 | .774 | .000 | .154  | .142  | .167  | .000   |

**RESULTS****Regression Weights: (KYRGYZSTAN)**

| Predictor            | Criterion | B       | Beta | S.E.   | C.R.   | P    |
|----------------------|-----------|---------|------|--------|--------|------|
| Detention unofficial | Drugs     | .006    | .168 | .002   | 3.279  | .001 |
| Anxiety              | Drugs     | .001    | .147 | .000   | 2.865  | .004 |
| Drugs                | HIV risk  | 205.058 | .652 | 12.442 | 16.481 | ***  |
| Social support       | HIV risk  | 1.766   | .078 | .901   | 1.960  | .050 |

**Variances: (KYRGYZSTAN)**

| Variables            | Estimate | S.E.   | C.R.   | P   |
|----------------------|----------|--------|--------|-----|
| Detention unofficial | 4.025    | .299   | 13.475 | *** |
| Social support       | .915     | .068   | 13.475 | *** |
| Anxiety              | 162.008  | 12.023 | 13.475 | *** |
| e1                   | .005     | .000   | 13.475 | *** |
| e2                   | 269.855  | 20.026 | 13.475 | *** |

**Squared Multiple Correlations: (KYRGYZSTAN)**

| Variables | Estimate |
|-----------|----------|
| Drugs     | .050     |
| HIV risk  | .431     |

**Matrices for Total, Direct, and Indirect Effects (KYRGYZSTAN)**

**Total Effects and Standardized Total Effects (KYRGYZSTAN)**

| Anxiety |      | Social support |      | Detention unofficial |      | Drugs   |      |                 |
|---------|------|----------------|------|----------------------|------|---------|------|-----------------|
| Total   | ST   | Total          | ST   | Total                | ST   | Total   | ST   | Criterion       |
| .001    | .147 | .000           | .000 | .006                 | .168 | .000    | .000 | <b>Drugs</b>    |
| .164    | .096 | 1.766          | .078 | 1.188                | .109 | 205.058 | .652 | <b>HIV risk</b> |

**Direct Effects and Standardized Direct Effects (KYRGYZSTAN)**

| Anxiety |      | Social support |      | Detention unofficial |         | Drugs |      |                 |
|---------|------|----------------|------|----------------------|---------|-------|------|-----------------|
| Total   | ST   | Total          | ST   | Total                | Total   | ST    | ST   | Criterion       |
| .001    | .147 | .000           | .000 | .006                 | .000    | .000  | .168 | <b>Drugs</b>    |
| .000    | .000 | 1.766          | .078 | .000                 | 205.058 | .652  | .000 | <b>HIV risk</b> |

**Indirect Effects and Standardized Indirect Effects (KYRGYZSTAN)**

| Anxiety |      | Social support |      | Detention unofficial |      | Drugs |      |                 |
|---------|------|----------------|------|----------------------|------|-------|------|-----------------|
| Total   | ST   | Total          | ST   | Total                | ST   | Total | ST   | Criterion       |
| .000    | .000 | .000           | .000 | .000                 | .000 | .000  | .000 | <b>Drugs</b>    |
| .164    | .096 | .000           | .000 | 1.188                | .109 | .000  | .000 | <b>HIV risk</b> |

**Model 4b.** Multi-group final model with bootstrap, covariates, standardized coefficients, and measures of fit for Azerbaijan

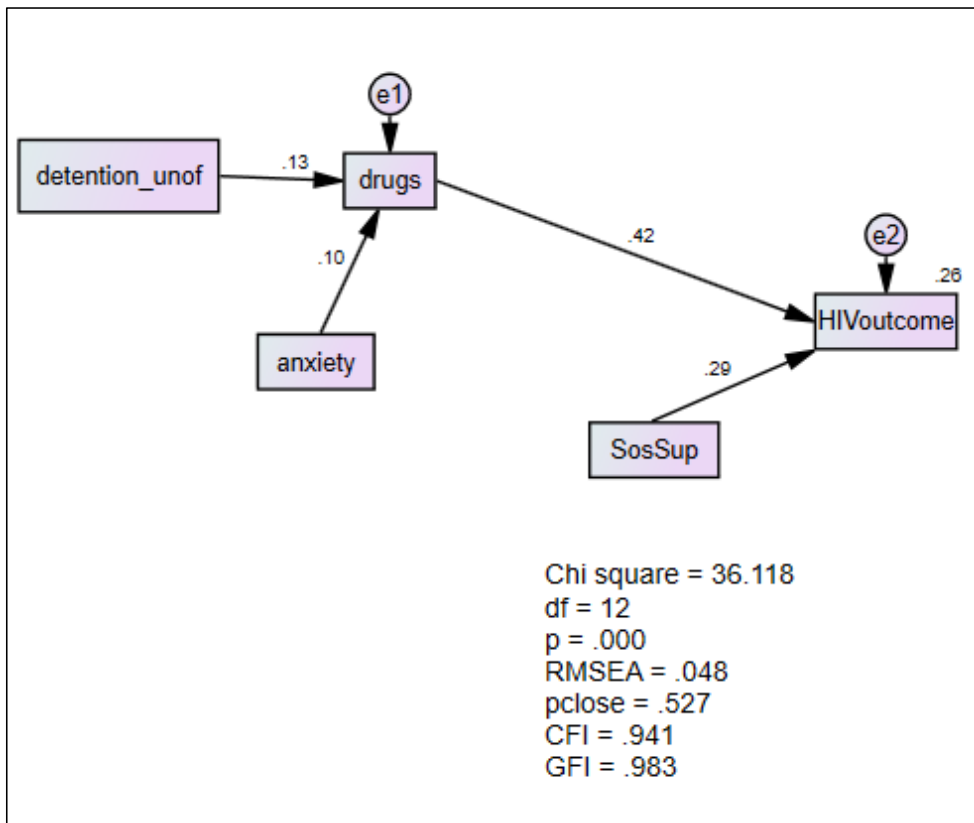

**RESULTS**

**Regression Weights: (AZERBAIJAN)**

| Predictor            | Criterion | B      | Beta | S.E.   | C.R.   | P    |
|----------------------|-----------|--------|------|--------|--------|------|
| Detention unofficial | Drugs     | .011   | .131 | .004   | 2.952  | .003 |
| Anxiety              | Drugs     | .000   | .105 | .000   | 2.369  | .018 |
| Drugs                | HIV risk  | 192.51 | .417 | 17.828 | 10.799 | ***  |
| Social support       | HIV risk  | 4.279  | .292 | .566   | 7.561  | ***  |

**Variances: (AZERBAIJAN)**

| Variables            | Estimate | S.E.   | C.R.   | P   |
|----------------------|----------|--------|--------|-----|
| Detention unofficial | .212     | .013   | 15.761 | *** |
| Social support       | 1.382    | .088   | 15.761 | *** |
| Anxiety              | 71.583   | 4.542  | 15.761 | *** |
| e1                   | .001     | .000   | 15.761 | *** |
| e2                   | 219.900  | 13.952 | 15.761 | *** |

**Squared Multiple Correlations: (AZERBAIJAN)**

| Variables | Estimate |
|-----------|----------|
| Drugs     | .028     |
| HIV risk  | .259     |

**Matrices for Total, Direct, and Indirect Effects (AZERBAIJAN)**

**Total Effects and Standardized Total Effects (AZERBAIJAN)**

| Anxiety |      | Social support |      | Detention unofficial |      | Drugs   |      |                 |
|---------|------|----------------|------|----------------------|------|---------|------|-----------------|
| Total   | ST   | Total          | ST   | Total                | ST   | Total   | ST   | Criterion       |
| .000    | .105 | .000           | .000 | .011                 | .131 | .000    | .000 | <b>Drugs</b>    |
| .089    | .044 | 4.279          | .292 | 2.035                | .054 | 192.518 | .417 | <b>HIV risk</b> |

**Direct Effects Standardized Direct Effects (AZERBAIJAN)**

| Anxiety |      | Social support |      | Detention unofficial |      | Drugs   |      |                 |
|---------|------|----------------|------|----------------------|------|---------|------|-----------------|
| Total   | ST   | Total          | ST   | Total                | ST   | Total   | ST   | Criterion       |
| .000    | .105 | .000           | .000 | .011                 | .131 | .000    | .000 | <b>Drugs</b>    |
| .000    | .000 | 4.279          | .292 | .000                 | .000 | 192.518 | .417 | <b>HIV risk</b> |

**Indirect Effects and Standardized Indirect Effects (AZERBAIJAN)**

| Anxiety |      | Social support |      | Detention unofficial |      | Drugs |      |                 |
|---------|------|----------------|------|----------------------|------|-------|------|-----------------|
| Total   | ST   | Total          | ST   | Total                | ST   | Total | ST   | Criterion       |
| .000    | .000 | .000           | .000 | .000                 | .000 | .000  | .000 | <b>Drugs</b>    |
| .089    | .044 | .000           | .000 | 2.035                | .054 | .000  | .000 | <b>HIV risk</b> |

*Note:* This Final model above is reported in Figures 1 (aggregate with no covariates) and table 2 (multi-group with indirect, direct, and total effects) of the originally submitted manuscript. Significant covariates from the results presented above are reported in table 6 of the manuscript.

**Model 5.** KYRGYZSTAN WPDI with two detention variables. The identical path diagram is also provided in the [originally submitted appendix manuscript \(Model-Figure 2\)](#), and the results are summarized in Table 7.

*Note:* WPDI model presented in the manuscript (Figure 2) combines Unofficial and Official detention.

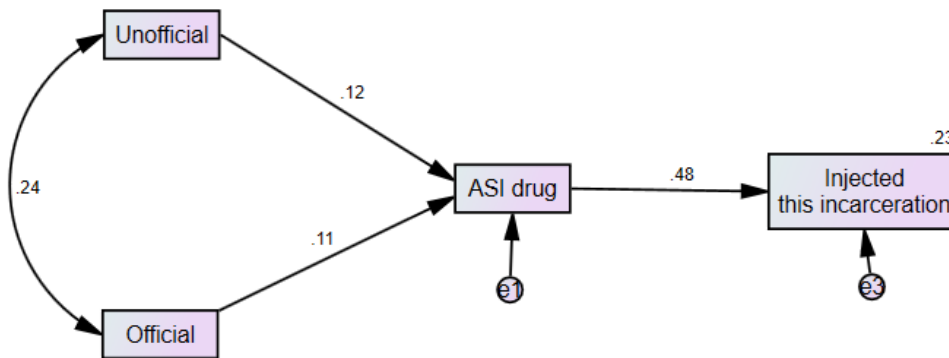

**Notes for Model**

Number of distinct sample moments: 10  
 Number of distinct parameters to be estimated: 8  
 Degrees of freedom (10 - 8): 2

Minimum was achieved  
 Chi-square = .435  
 Degrees of freedom = 2  
 Probability level = .805

**Model Fit Summary**

**RMR, GFI**

| Model              | GFI  | AGFI | CFI   | RMSEA | LO 90 | HI 90 | PCLOSE |
|--------------------|------|------|-------|-------|-------|-------|--------|
| Default model      | .999 | .997 | 1.000 | .000  | .000  | .066  | .911   |
| Independence model | .852 | .753 | .000  | .239  | .204  | .276  | .000   |

## RESULTS

### Regression Weights:

| Predictor            | Criterion          | B     | Beta | S.E. | C.R.   | P    |
|----------------------|--------------------|-------|------|------|--------|------|
| Detention unofficial | Addiction severity | .003  | .120 | .001 | 2.219  | .027 |
| Detention official   | Addiction severity | .008  | .113 | .004 | 2.103  | .036 |
| Addiction severity   | WPDI               | 2.228 | .481 | .216 | 10.302 | ***  |

### Covariances and Correlations:

| Variables                                    | Estimate | S.E. | C.R.  | P   | Correlation |
|----------------------------------------------|----------|------|-------|-----|-------------|
| Detention unofficial <--> Detention official | .944     | .213 | 4.434 | *** | .243        |

### Variances:

| Variables            | Estimate | S.E. | C.R.   | P   |
|----------------------|----------|------|--------|-----|
| Detention unofficial | 11.578   | .871 | 13.285 | *** |
| Detention official   | 1.306    | .098 | 13.285 | *** |
| e1                   | .007     | .001 | 13.285 | *** |
| e3                   | .119     | .009 | 13.285 | *** |

### Squared Multiple Correlations:

| Variables          | Estimate |
|--------------------|----------|
| Addiction severity | .034     |
| WPDI               | .231     |



**Matrices for Total, Direct, and Indirect Effects**

**Total Effects and Standardized Total Effects**

| Detention official |      | Detention unofficial |      | Addiction severity |      |                           |
|--------------------|------|----------------------|------|--------------------|------|---------------------------|
| Total              | ST   | Total                | ST   | Total              | ST   | <b>Criterion</b>          |
| .008               | .113 | .003                 | .120 | .000               | .000 | <b>Addiction severity</b> |
| .019               | .055 | .007                 | .058 | 2.228              | .481 | <b>WPDI</b>               |

**Direct Effects and Standardized Direct Effects**

| Detention official |      | Detention unofficial |      | Addiction severity |      |                           |
|--------------------|------|----------------------|------|--------------------|------|---------------------------|
| Total              | ST   | Total                | ST   | Total              | ST   | <b>Criterion</b>          |
| .008               | .113 | .003                 | .120 | .000               | .000 | <b>Addiction severity</b> |
| .000               | .000 | .000                 | .000 | 2.228              | .481 | <b>WPDI</b>               |

**Indirect Effects and Standardized Indirect Effects**

| Detention official |      | Detention unofficial |      | Addiction severity |      |                           |
|--------------------|------|----------------------|------|--------------------|------|---------------------------|
| Total              | ST   | Total                | ST   | Total              | ST   | <b>Criterion</b>          |
| .000               | .000 | .000                 | .000 | .000               | .000 | <b>Addiction severity</b> |
| .019               | .055 | .007                 | .058 | .000               | .000 | <b>WPDI</b>               |

## References

1. Preacher KJ, Rucker DD, Hayes AF. Addressing Moderated Mediation Hypotheses: Theory, Methods, and Prescriptions. *Multivariate Behavioral Research*. 2007;42(1):185-227.
2. Bollen KA, Stine RA. Bootstrapping goodness-of-fit measures in structural equation models. *Sociological Methods & Research*. 1992;21(2):205-229.
3. Hu L-t, Bentler PM. Fit indices in covariance structure modeling: Sensitivity to underparameterized model misspecification. *Psychological methods*. 1998;3(4):424.
4. Bentler PM. Comparative fit indexes in structural models. *Psychological bulletin*. 1990;107(2):238.
5. Kline RB. *Principles and practice of structural equation modeling*. Guilford publications, New York, NY; 2015.
6. Hoyle RH. Path analysis and structural equation modeling with latent variables. In: Cooper H., ed. APA handbook of research methods in psychology: Vol. 2. Quantitative, qualitative, neuropsychological, and biological. American Psychological Association, Washington, DC; 2012:333-367.

Formaterat:

Teckensnitt:Kursiv
